# Supplementary material
Source: Springer Nature journal article supplement (https://www.springermedizin.de/resource/supplementary/12986_2008_180_MOESM6_ESM.pdf/25655534)

**A**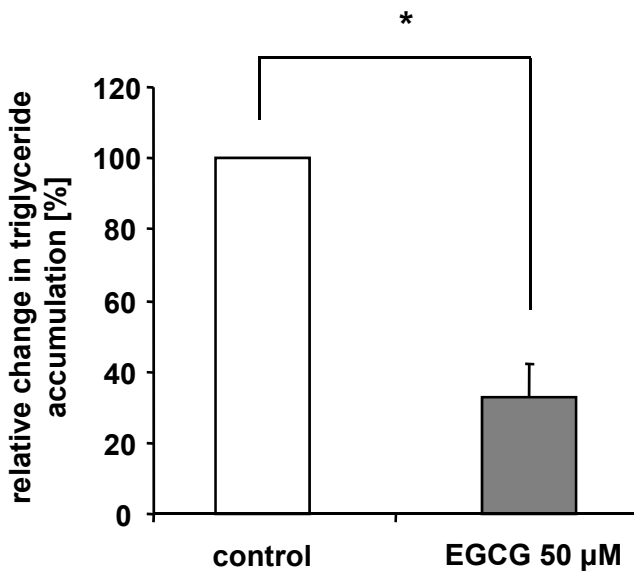**B**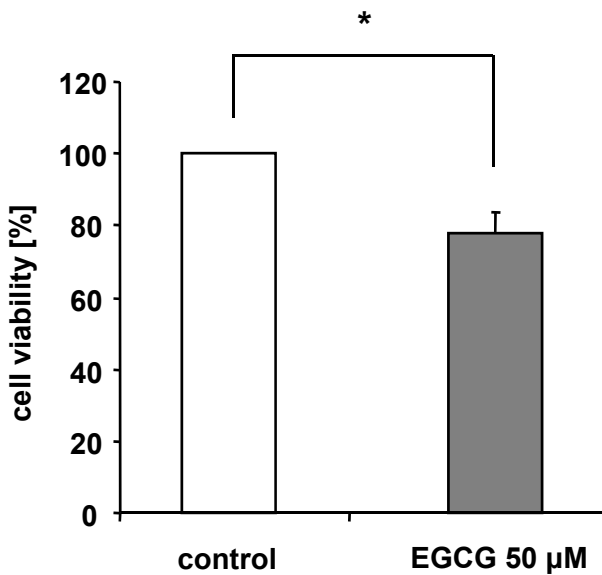

Supplement: MOESM6 [file 25655534]
